# Supplementary material for: Mfsd2a and Glut1 Brain Nutrient Transporters Expression Increase with 32-Week Low and High Lard Compared with Fish-Oil Dietary Treatment in C57Bl/6 Mice
Source: PubMed Central journal article supplement — Curr Dev Nutr. 2018 Jul 27;2(10):nzy065. doi: 10.1093/cdn/nzy065 (PMC6186908; doi:10.1093/cdn/nzy065), 2018-07-27
Supplement: nzy065_supplement_file.pdf [file nzy065_supplement_file.pdf]

**Supplemental Table-1: Diet fatty acid profiles.**

|                                  | Low fat w/ Lard/Soybean<br>10 kcal% Fat | High Fat w/ Lard/Soybean<br>41 kcal% Fat | Low Fat w/ Menhaden<br>10 kcal% Fat | High Fat w/ Menhaden<br>41 kcal% Fat |
|----------------------------------|-----------------------------------------|------------------------------------------|-------------------------------------|--------------------------------------|
| <b>Product#</b>                  | <b>D12450H</b>                          | <b>D15071701</b>                         | <b>D15071702</b>                    | <b>D15071703</b>                     |
| <b>Ingredient</b>                | <i>gm</i>                               | <i>gm</i>                                | <i>gm</i>                           | <i>gm</i>                            |
| Lard                             | 20                                      | 160                                      | 0                                   | 0                                    |
| Menhaden Oil, ARBP-F             | 0                                       | 0                                        | 20                                  | 160                                  |
| Soybean Oil                      | 25                                      | 25                                       | 25                                  | 25                                   |
| <b>Total</b>                     | <b>45</b>                               | <b>185</b>                               | <b>45</b>                           | <b>185</b>                           |
| C2, Acetic                       | 0.0                                     | 0.0                                      | 0.0                                 | 0.0                                  |
| C4, Butyric                      | 0.0                                     | 0.0                                      | 0.0                                 | 0.0                                  |
| C6, Caproic                      | 0.0                                     | 0.0                                      | 0.0                                 | 0.0                                  |
| C8, Caprylic                     | 0.0                                     | 0.0                                      | 0.0                                 | 0.0                                  |
| C10, Capric                      | 0.0                                     | 0.1                                      | 0.0                                 | 0.0                                  |
| C12, Lauric                      | 0.0                                     | 0.1                                      | 0.0                                 | 0.0                                  |
| C14, Myristic                    | 0.3                                     | 1.9                                      | 1.4                                 | 11.1                                 |
| C14:1, Myristoleic               | 0.0                                     | 0.0                                      | 0.0                                 | 0.0                                  |
| C15                              | 0.0                                     | 0.1                                      | 0.1                                 | 0.1                                  |
| C16, Palmitic                    | 6.4                                     | 33.5                                     | 5.5                                 | 26.3                                 |
| C16:1, Palmitoleic               | 0.3                                     | 2.2                                      | 2.0                                 | 15.6                                 |
| C16:2                            | 0.0                                     | 0.0                                      | 0.3                                 | 2.6                                  |
| C16:3                            | 0.0                                     | 0.0                                      | 0.3                                 | 2.4                                  |
| C16:4                            | 0.0                                     | 0.0                                      | 0.3                                 | 2.4                                  |
| C17                              | 0.1                                     | 0.6                                      | 0.1                                 | 0.6                                  |
| C18, Stearic                     | 3.1                                     | 17.9                                     | 1.5                                 | 5.1                                  |
| C18:1, Oleic                     | 12.3                                    | 58.3                                     | 7.7                                 | 21.1                                 |
| C18:2, Linoleic                  | 17.8                                    | 52.0                                     | 13.3                                | 16.0                                 |
| C18:3, Linolenic                 | 2.1                                     | 4.0                                      | 2.2                                 | 4.3                                  |
| C18:4, Stearidonic               | 0.0                                     | 0.0                                      | 0.6                                 | 5.0                                  |
| C20, Arachidic                   | 0.1                                     | 0.3                                      | 0.1                                 | 0.4                                  |
| C20:1,                           | 0.2                                     | 1.1                                      | 0.4                                 | 2.5                                  |
| C20:2                            | 0.2                                     | 1.3                                      | 0.0                                 | 0.3                                  |
| C20:3                            | 0.0                                     | 0.2                                      | 0.1                                 | 0.6                                  |
| C20:4, Arachidonic               | 0.1                                     | 0.5                                      | 0.4                                 | 3.4                                  |
| C20:5, Eicosapentaenoic          | 0.0                                     | 0.0                                      | 2.8                                 | 22.7                                 |
| C21:5                            | 0.0                                     | 0.0                                      | 0.2                                 | 1.2                                  |
| C22, Behenic                     | 0.1                                     | 0.1                                      | 0.1                                 | 0.2                                  |
| C22:1, Erucic                    | 0.0                                     | 0.0                                      | 0.1                                 | 0.5                                  |
| C22:4, Clupanodonic              | 0.0                                     | 0.0                                      | 0.0                                 | 0.3                                  |
| C22:5, Docosapentaenoic          | 0.0                                     | 0.1                                      | 0.6                                 | 4.5                                  |
| C22:6, Docosahexaenoic           | 0.0                                     | 0.0                                      | 2.1                                 | 16.4                                 |
| C24, Lignoceric                  | 0.0                                     | 0.0                                      | 0.2                                 | 1.0                                  |
| C24:1                            | 0.0                                     | 0.0                                      | 0.0                                 | 0.3                                  |
| <b>Total</b>                     | <b>43.1</b>                             | <b>174.3</b>                             | <b>42.3</b>                         | <b>167.5</b>                         |
| <b>Saturated (g)</b>             | <b>10.1</b>                             | <b>54.7</b>                              | <b>9.0</b>                          | <b>45.4</b>                          |
| <b>Monounsaturated (g)</b>       | <b>12.8</b>                             | <b>61.6</b>                              | <b>10.1</b>                         | <b>40.0</b>                          |
| <b>Polyunsaturated (g)</b>       | <b>20.2</b>                             | <b>58.0</b>                              | <b>23.2</b>                         | <b>82.1</b>                          |
| <b>Saturated (%)</b>             | <b>23.5</b>                             | <b>31.4</b>                              | <b>21.2</b>                         | <b>27.1</b>                          |
| <b>Monounsaturated (%)</b>       | <b>29.7</b>                             | <b>35.3</b>                              | <b>23.9</b>                         | <b>23.9</b>                          |
| <b>Polyunsaturated (%)</b>       | <b>46.8</b>                             | <b>33.3</b>                              | <b>54.9</b>                         | <b>49.0</b>                          |
| <b>Linoleic Acid (%)</b>         | <b>41.3</b>                             | <b>29.8</b>                              | <b>31.5</b>                         | <b>9.5</b>                           |
| <b>Oleic Acid (%)</b>            | <b>28.6</b>                             | <b>33.5</b>                              | <b>18.1</b>                         | <b>12.6</b>                          |
| <b>Alpha-linolenic acid (%)</b>  | <b>4.9</b>                              | <b>2.3</b>                               | <b>5.1</b>                          | <b>2.5</b>                           |
| <b>Eicosapentaenoic Acid (%)</b> | <b>0.0</b>                              | <b>0.0</b>                               | <b>6.7</b>                          | <b>13.6</b>                          |
| <b>Docosahexaenoic Acid (%)</b>  | <b>0.0</b>                              | <b>0.0</b>                               | <b>4.9</b>                          | <b>9.8</b>                           |
| <b>Total Omega-3 (%)</b>         | <b>4.9</b>                              | <b>2.4</b>                               | <b>19.4</b>                         | <b>31.5</b>                          |
